# Supplementary material for: Non-invasive assessment of hepatic mitochondrial metabolism by positional isotopomer NMR tracer analysis (PINTA)
Source: PubMed Central journal article supplement (PMC5630596; doi:10.1038/s41467-017-01143-w), 2017-10-06
Supplement: 41467_2017_1143_MOESM1_ESM.pdf [file 41467_2017_1143_MOESM1_ESM.pdf]

|                                       | [1- <sup>13</sup> C]<br>Glucose | [2- <sup>13</sup> C]<br>Glucose | [3- <sup>13</sup> C]<br>Glucose | [4- <sup>13</sup> C]<br>Glucose | [5- <sup>13</sup> C]<br>Glucose | [6- <sup>13</sup> C]<br>Glucose | [2- <sup>13</sup> C]<br>Glutamate | [3- <sup>13</sup> C]<br>Glutamate | V <sub>PDH</sub> /<br>V <sub>CS</sub><br>(%) | V <sub>PK+ME</sub> /<br>V <sub>PC+PDH</sub><br>(%) |
|---------------------------------------|---------------------------------|---------------------------------|---------------------------------|---------------------------------|---------------------------------|---------------------------------|-----------------------------------|-----------------------------------|----------------------------------------------|----------------------------------------------------|
| Control                               | 6.0±0.3                         | 4.6±0.2                         | 0.9±0.1                         | 0.9±0.1                         | 5.7±0.3                         | 7.8±0.4                         | 7.3±0.4                           | 7.1±0.4                           | 3.4±0.1                                      | 5.9±0.1                                            |
| ME inhibitor                          | 3.6±0.5                         | 2.7±0.3                         | 0.6±0.1                         | 0.6±0.1                         | 3.3±0.4                         | 4.5±0.5                         | 4.4±0.7                           | 4.5±0.6                           | 2.0±1.1                                      | 7.9±2.1                                            |
| Glucagon                              | 4.9±0.4                         | 3.5±0.2                         | 1.3±0.2                         | 1.2±0.1                         | 4.0±0.3                         | 6.0±0.4                         | 4.6±0.5                           | 4.8±0.6                           | 2.7±0.1                                      | <2%                                                |
| Epinephrine                           | 5.0±0.3                         | 3.9±0.2                         | 0.4±0.1                         | 0.5±0.1                         | 5.1±0.4                         | 6.8±0.4                         | 5.5±0.4                           | 5.5±0.2                           | 4.3±1.0                                      | 5.4±0.1                                            |
| Hyperinsulinemic-<br>euglycemic clamp | 3.8±0.4                         | 2.9±0.3                         | 0.6±0.2                         | 0.8±0.1                         | 3.7±0.4                         | 4.9±0.5                         | 5.4±0.5                           | 5.3±0.5                           | 3.8±0.5                                      | 14.8±4.6                                           |
| HFD                                   | 4.1±0.3                         | 3.0±0.3                         | 0.9±0.2                         | 0.7±0.2                         | 3.2±0.3                         | 4.4±0.7                         | 4.8±0.6                           | 4.8±0.4                           | 2.6±0.4                                      | 6.6±1.2                                            |
| HFD-CRMP                              | 3.4±0.8                         | 2.5±0.7                         | 1.0±0.2                         | 1.0±0.2                         | 3.4±0.9                         | 4.2±1.0                         | 4.6±0.3                           | 4.5±0.4                           | 4.1±0.5                                      | 6.1±0.6                                            |
| <b>Average<br/>(all groups)</b>       |                                 |                                 |                                 |                                 |                                 |                                 |                                   |                                   | <b>3.8±0.5</b>                               | <b>5.8±0.7</b>                                     |

**Supplementary Table 1.** Raw data from all groups of rats in this study. Data are presented as the mean±S.E.M. of n=16 (controls), n=5 (HFD-CRMP), or n=6 (all other groups) rats per group.

|                                       | Total [m+1]<br>Glucose | Total [m+2]<br>Glucose | C4C5C6 [m+2]<br>Glucose | V <sub>PC</sub> /V <sub>EGP</sub><br>(%) |
|---------------------------------------|------------------------|------------------------|-------------------------|------------------------------------------|
| Control                               | 26.9±1.0               | 5.7±0.5                | 0.42±0.06               | 72±2                                     |
| ME inhibitor                          | 15.2±1.7               | 2.1±0.6                | 0.07±0.04               | 50±2                                     |
| Glucagon                              | 22.3±2.2               | 4.2±0.7                | 0.24±0.06               | 65±3                                     |
| Epinephrine                           | 22.2±1.6               | 4.0±0.8                | 0.25±0.05               | 67±2                                     |
| Hyperinsulinemic-<br>euglycemic clamp | 11.2±3.1               | 1.6±0.7                | 0.16±0.03               | 42±6                                     |
| HFD                                   | 24.0±1.5               | 5.3±0.6                | 0.64±0.22               | 64±5                                     |
| HFD-CRMP                              | 20.0±4.2               | 3.9±1.4                | 0.23±0.10               | 58±7                                     |

**Supplementary Table 2.** Glucose enrichment in all groups of rats in this study. Data are presented as the mean±S.E.M. of n=16 (controls), n=5 (HFD-CRMP), or n=6 (all other groups) rats per group.

# Supplementary Figure 1

A

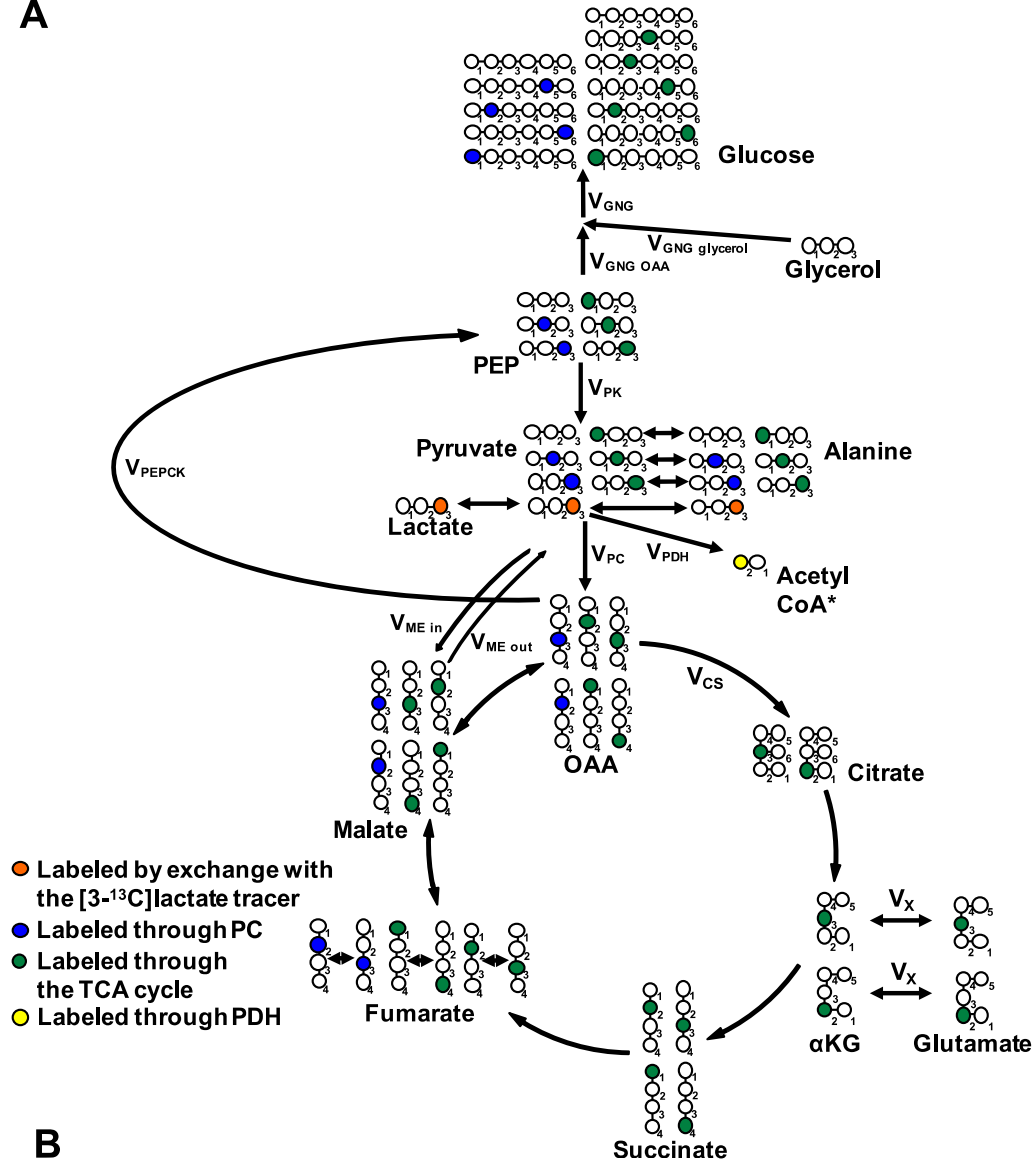

B

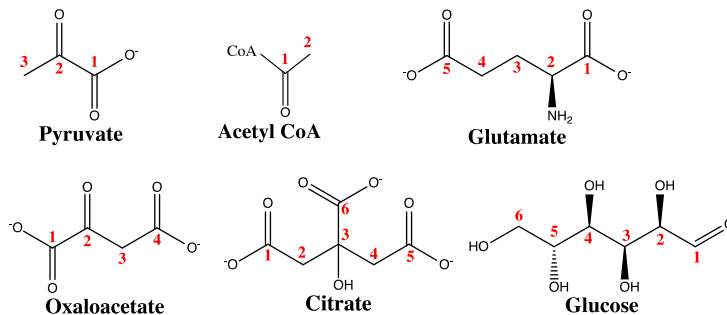

**Supplementary Fig. 1.** (A) [3-<sup>13</sup>C]lactate tracer labeling scheme.  $\alpha$ -KG,  $\alpha$ -ketoglutarate; CS, citrate synthase; GNG, gluconeogenesis; ME, malic enzyme; OAA, oxaloacetate; PEPCK, phosphoenolpyruvate carboxykinase. (B) Chemical structures of key metabolites with the labeling convention used in this study.

## Supplementary Figure 2

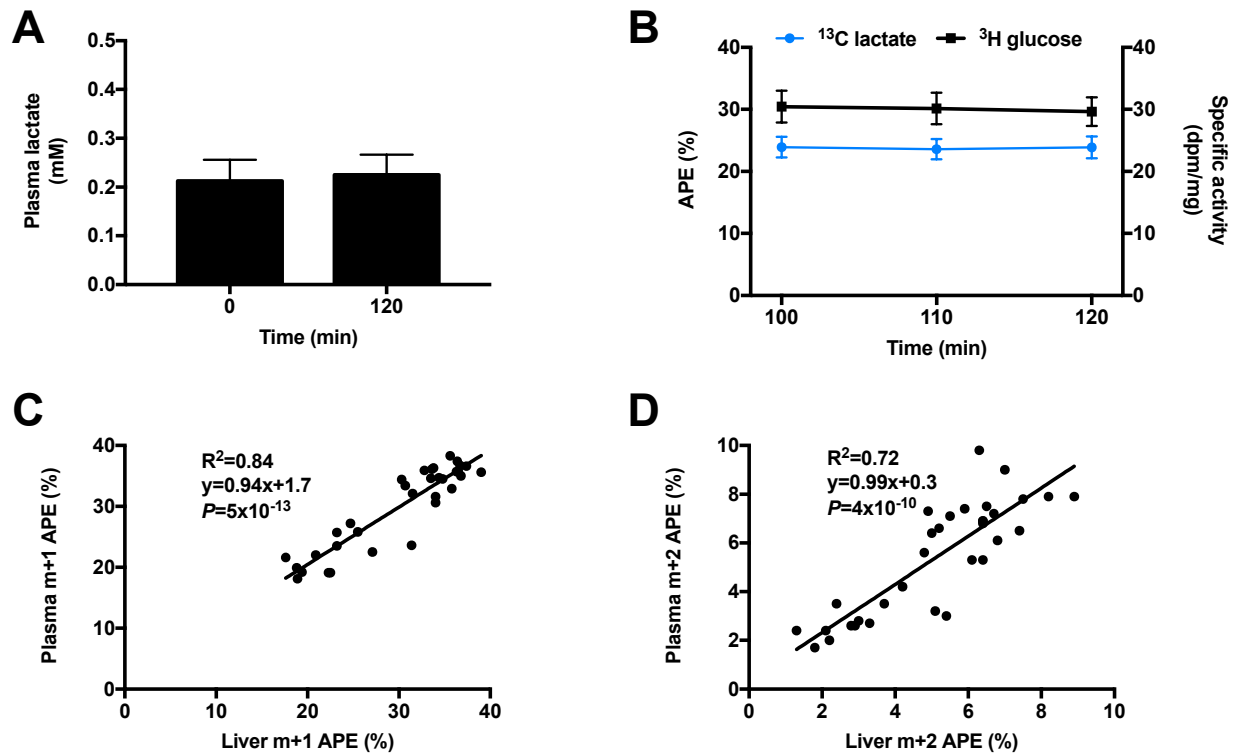

**Supplementary Fig. 2.** Plasma glucose enrichment is a good surrogate for liver glucose enrichment in rats infused with  $[3\text{-}^{13}\text{C}]\text{lactate}$  at steady-state. (A) Plasma lactate concentrations before and after a 120 min infusion of  $[3\text{-}^{13}\text{C}]\text{lactate}$ . In panels (A) and (B), data are the mean  $\pm$  S.E.M. of  $n=16$  per time point. (B) Plasma  $^{13}\text{C}$  lactate enrichment and  $^3\text{H}$  glucose specific activity at steady-state. (C) m+1 glucose enrichment. (D) m+2 glucose enrichment.

# Supplementary Figure 3

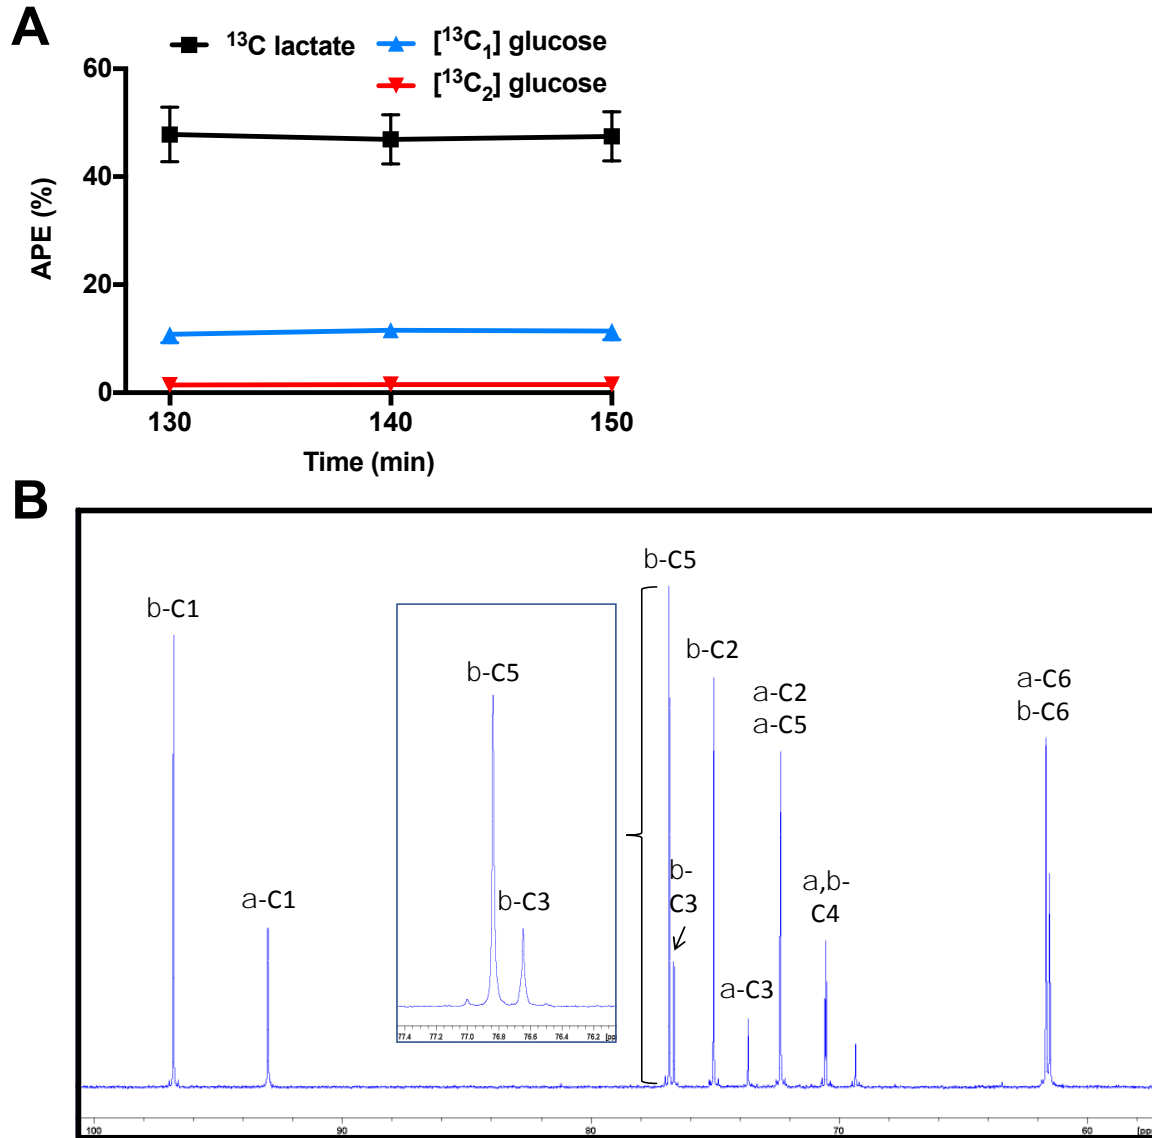

**Supplementary Fig. 3.** Calculation of hepatic fluxes in non-diabetic, overnight fasted humans. (A) Plasma  $[^{13}\text{C}]$ lactate and m+1 and m+2  $[^{13}\text{C}]$ glucose enrichments. Data are the mean  $\pm$  S.E.M. of three subjects. (B) Representative  $^{13}\text{C}$  NMR spectrum of plasma glucose.

# Supplementary Figure 4

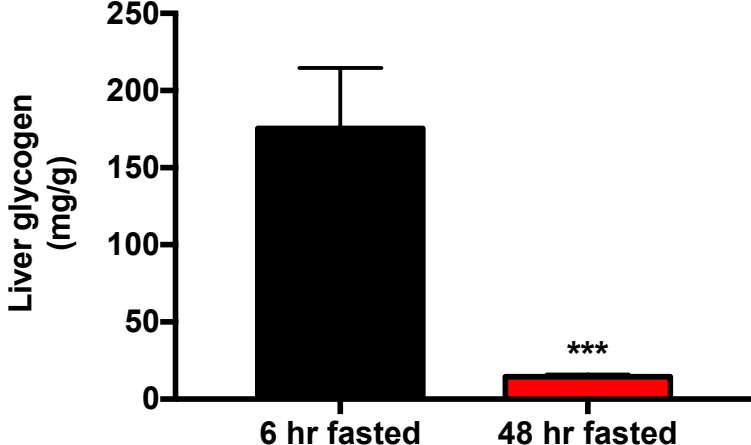

Supplementary Fig. 4. Hepatic glycogen content is reduced after a 48 hr fast. Data are the mean±S.E.M. of n=5 per group.
